# Supplementary material for: Importance of the 2,6-Difluorobenzamide Motif for FtsZ Allosteric Inhibition: Insights from Conformational Analysis, Molecular Docking and Structural Modifications
Source: MDPI journal article supplement (doi:10.3390/molecules28052055), 2023-02-22
Supplement: s1 [file s1]

# Importance of the 2,6-Difluorobenzamide Motif for FtsZ Allosteric Inhibition: Insights from Conformational Analysis, Molecular Docking and Structural Modifications

Thibaut Barbier <sup>1</sup>, Oana Dumitrescu <sup>2,3</sup>, Gérard Lina <sup>2,3</sup>, Yves Queneau <sup>1</sup> and Laurent Soullère <sup>1,\*</sup>

<sup>1</sup> Univ Lyon, INSA Lyon, Université Claude Bernard Lyon 1, CNRS, CPE-Lyon, ICBMS, UMR 5246, Institut de Chimie et de Biochimie Moléculaires et Supramoléculaires, Bâtiment Lederer, 1 Rue Victor Grignard, 69622 Villeurbanne, France

<sup>2</sup> Hospices Civils de Lyon, Hôpital de la Croix Rousse-Centre de Biologie Nord, Laboratoire de Bactériologie, Institut des Agents Infectieux, Grande Rue de la Croix Rousse, 69004 Lyon, France

<sup>3</sup> Team StaPath, CIRI, Centre International de Recherche en Infectiologie, Inserm, U1111, Université Claude Bernard Lyon 1, CNRS, UMR 5308, ENS de Lyon, 69007 Lyon, France

\* Correspondence: laurent.soullere@insa-lyon.fr

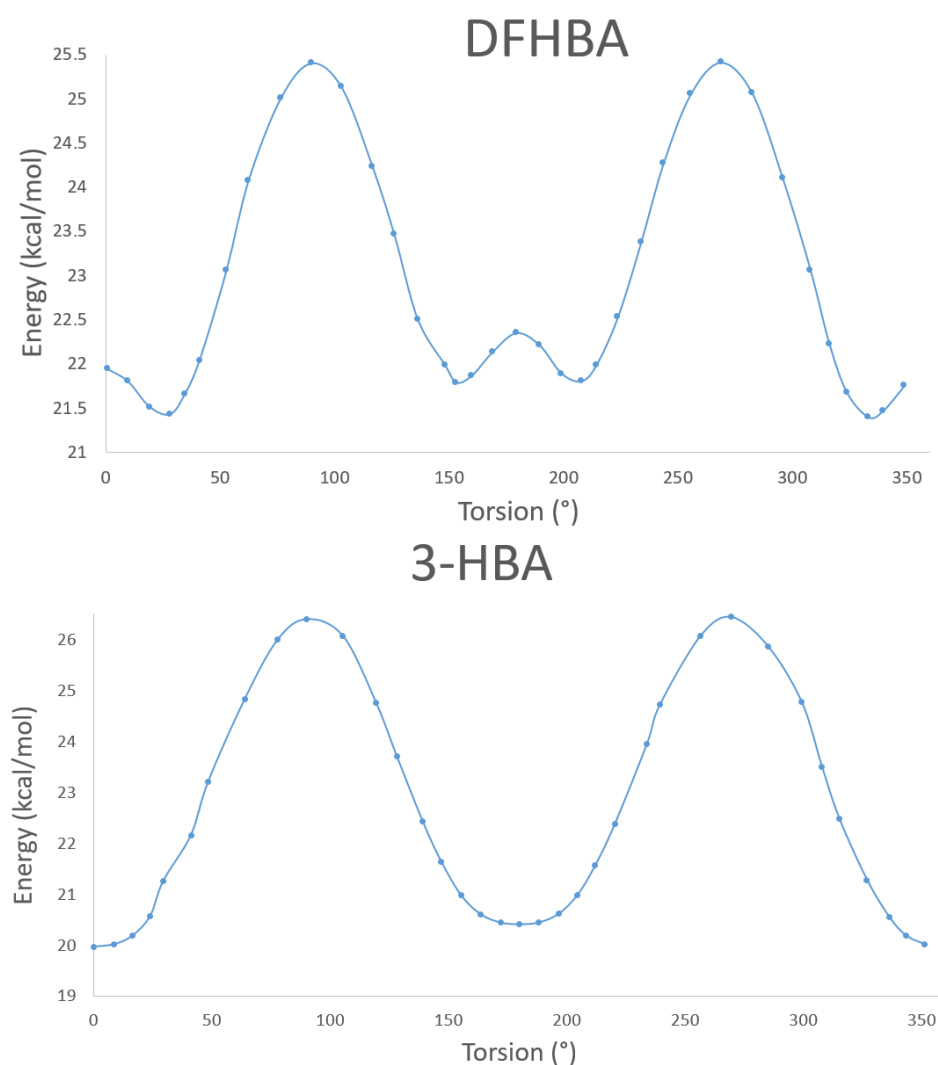

**Figure S1.** Conformational analysis of DFHBA and 3-HBA obtained as a result of variation of the torsion angle between the carboxamide and the phenyl group.
